# Supplementary material for: Titanium metal–organic frameworks for photocatalytic CO2 conversion through a cycloaddition reaction
Source: Royal Society of Chemistry journal article supplement (doi:10.1039/d4na00535j), 2024-01-01

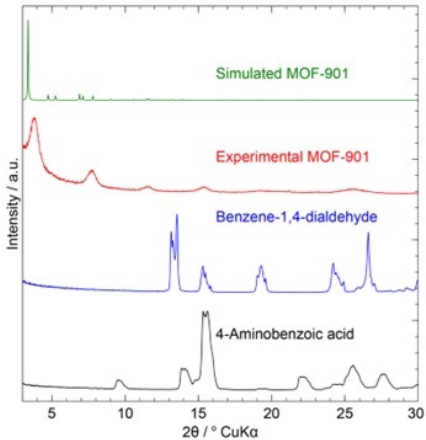

Supplement: d4na00535j1.pdf [file d4na00535j1.pdf]
