# Supplementary material for: Titanium metal–organic frameworks for photocatalytic CO2 conversion through a cycloaddition reaction
Source: Royal Society of Chemistry journal article supplement (doi:10.1039/d4na00535j), 2024-01-01
Supplement: d4na00535j8.pdf [file d4na00535j8.pdf]

**Table S1.** EDXS-Atomic percentages of different elements in MOF-901 and MOF-997

| <b>Element</b> | <b>MOF-901</b> | <b>MOF-997</b> |
|----------------|----------------|----------------|
| Carbon         | 52.93          | 33.84          |
| Titanium       | 7.18           | 13.90          |
| Oxygen         | 39.9           | 52.27          |
