# Supplementary material for: Titanium metal–organic frameworks for photocatalytic CO2 conversion through a cycloaddition reaction
Source: Royal Society of Chemistry journal article supplement (doi:10.1039/d4na00535j), 2024-01-01
Supplement: d4na00535j9.pdf [file d4na00535j9.pdf]

**Table S2.** Styrene carbonate conversion catalyzed by imine, amide linkers, and Ti-oxo cluster

| <b>Material</b> | <b>Conversion (%)</b> |
|-----------------|-----------------------|
| Imine linker    | 16.0                  |
| Amide linker    | 45.0                  |
| Ti-oxo cluster  | 33.0                  |
