# Supplementary material for: Titanium metal–organic frameworks for photocatalytic CO2 conversion through a cycloaddition reaction
Source: Royal Society of Chemistry journal article supplement (doi:10.1039/d4na00535j), 2024-01-01
Supplement: d4na00535j10.pdf [file d4na00535j10.pdf]

**Table S3.** Cycloaddition of CO<sub>2</sub> and styrene oxide under neat (green) conditions

| Entry | Photocatalyst <sup>[a]</sup>                                   | Catalyst<br>(mol%) | Yield% <sup>[b]</sup> | TON <sup>[c]</sup> | TOF (h <sup>-1</sup> ) <sup>[d]</sup> |
|-------|----------------------------------------------------------------|--------------------|-----------------------|--------------------|---------------------------------------|
| 1     | MOF-901, <i>n</i> -Bu <sub>4</sub> NBr, light                  | 0.005              | 99.9                  | 64.4               | 2.7                                   |
| 2     | MOF-997, <i>n</i> -Bu <sub>4</sub> NBr, light                  | --                 | 99.9                  | --                 | --                                    |
| 3     | MOF-997-O, <sup>n</sup> Bu <sub>4</sub> NBr, light             | --                 | 99.9                  | --                 | --                                    |
| 4     | <i>n</i> -Bu <sub>4</sub> NBr, no catalyst, light              | --                 | 23                    | --                 | --                                    |
| 5     | MOF-901 light                                                  | 0.005              | 0                     | 0                  | 0                                     |
| 6     | MOF-901, <i>n</i> -Bu <sub>4</sub> NBr, no light               | 0.005              | 0                     | 0                  | 0                                     |
| 7     | MOF-901, no light                                              | 0.005              | 0                     | 0                  | 0                                     |
| 8     | <i>n</i> -Bu <sub>4</sub> NBr, no catalyst, no light           | --                 | 0                     | 0                  | 0                                     |
| 9     | MOF-901, <i>n</i> -Bu <sub>4</sub> NBr, no light, heat (353 K) | 0.005              | 25                    | 16                 | 0.7                                   |
| 10    | TiO <sub>2</sub> , <i>n</i> -Bu <sub>4</sub> NBr, light        | --                 | 50                    | --                 | --                                    |
| 11    | TiO <sub>2</sub> , light                                       | --                 | 12                    | --                 | --                                    |
| 12    | No <i>n</i> -Bu <sub>4</sub> NBr, no catalyst, light           | --                 | 0                     | --                 | --                                    |

<sup>a</sup>Reaction condition: styrene oxide (0.44 mmol), photocatalyst (10 mg), *n*-Bu<sub>4</sub>NBr (9 mg, 0.028 mmol), and 0.045 mmol carbon dioxide at 353 K and 24 h in 4 mL of acetonitrile/methanol (3:1 v:v);

<sup>b</sup>Conversion determined by <sup>1</sup>H NMR; <sup>c</sup>TON: turnover number = (mmol of product)/(mmol of catalyst);

<sup>d</sup>TOF: turnover frequency = (mmol of product)/(mmol of catalyst)(reaction time, hour); <sup>b</sup>Conversion determined by <sup>1</sup>H-NMR.
